# Supplementary material for: An explainable language model predicts survival from medical reports in oncology
Source: Research Square preprint supplement (doi:10.21203/rs.3.rs-7121466/v1), 2025-08-27
Supplement: Supplementary file 2 [file 82bfbaf9d58eb325efe9f125.docx]

**A explainable deep learning model predicts survival from medical reports in Oncology**

***Supplementary Tables***

**Supplementary table 1. Details of the type of electronic health reports of documents extracted from the hospital #1 (GR).**

| **Type of documents** | **Count (×1000)** | **Proportion (%)** |
| --- | --- | --- |
| **Consultation reports** | 1348 | 47 |
| **Radiological reports** | 437 | 15 |
| **Clinical notes** | 330 | 12 |
| **Hospitalization reports** | 306 | 11 |
| **Others** | ∼300 | 11 |

**Supplementary table 2. Results of hyperparameter search**

| **Hyper-parameters** | **Data types** | **Options** | **Best hyper-parameters** |
| --- | --- | --- | --- |
| **Learning rate** | Log uniform | [10^{-6},10^{-4}] | 1e-5 |
| **Weight Decay** | Categorical | {0, 1e-2, 1e-1} | 0 |
| **Dropout Rate** | Categorical | {0, 0.1, 0.2, 0.5} | 0.1 |
| Number of heads for K-memBERT-T2 | Categorical | {4, 8, 16} | 8 |
| Number of layer for K-memBERT-T2 | Categorical | 2, 4, 8 | 4 |
| Time2Vec dimension | Categorical | 8, 16, 32 | 8 |
| max_ehr | Categorical | 4, 8, 16 | 4 (conflation), 8 (T2) |

**Supplementary table 3. Details of performances obtained during validation and independent testing in hospital #1 (GR) and hospital #2 (CLB)**

| **K-memBERT-T2 performances** | **Pearson correlation** | **3-month AUC** | **1-year AUC** | **701-day AUC** |
| --- | --- | --- | --- | --- |
| **GR validation** | 0.686 | 0.856 | 0.832 | 0.843 |
| **GR test** | 0.655 | 0.852 | 0.817 | 0.827 |
| **CLB test** | 0.621 | 0.875 | 0.806 | 0.789 |

**Supplementary table 4. Details of performances of the model on the sub-cohorts composed from the external dataset.**

| **Cohort** | **1** | **2** | **3** | **4** | **5** | **6** | **7** | **8** | **9** | **10** | **Mean** | **SD** |
| --- | --- | --- | --- | --- | --- | --- | --- | --- | --- | --- | --- | --- |
| Correlation | 0.601 | 0.618 | 0.622 | 0.623 | 0.595 | 0.635 | 0.629 | 0.619 | 0.610 | 0.604 | 0.615 | 0.012 |
| Accuracy 90 | 0.900 | 0.900 | 0.900 | 0.907 | 0.904 | 0.895 | 0.900 | 0.901 | 0.897 | 0.903 | 0.901 | 0.003 |
| F1 90 | 0.367 | 0.390 | 0.365 | 0.385 | 0.356 | 0.348 | 0.368 | 0.355 | 0.347 | 0.365 | 0.365 | 0.014 |
| Accuracy 360 | 0.743 | 0.751 | 0.748 | 0.749 | 0.747 | 0.757 | 0.747 | 0.753 | 0.744 | 0.738 | 0.748 | 0.005 |
| F1 360 | 0.612 | 0.641 | 0.635 | 0.632 | 0.617 | 0.647 | 0.635 | 0.633 | 0.625 | 0.620 | 0.630 | 0.010 |
| Accuracy 701 | 0.703 | 0.720 | 0.717 | 0.725 | 0.707 | 0.726 | 0.725 | 0.720 | 0.710 | 0.713 | 0.716 | 0.008 |
| F1 701 | 0.745 | 0.767 | 0.765 | 0.770 | 0.750 | 0.769 | 0.768 | 0.761 | 0.756 | 0.765 | 0.761 | 0.008 |

**Supplementary table 5. Details of the performances of the model according to the PS class and the prediction interval**

|  |  | **Precision** | | **Recall** | | **F1-Score** | | **Cohen kappa score** | |
| --- | --- | --- | --- | --- | --- | --- | --- | --- | --- |
| Interval Prediction | PS | Interval Prediction | PS | Interval Prediction | PS | Interval Prediction | PS | Interval Prediction | PS |
| [.0 - .2] | PS=4 | 0.725 | 0.650 | 0.330 | 0.027 | 0.453 | 0.052 |  |  |
| [.2 - .4] | PS=3 | 0.314 | 0.188 | 0.301 | 0.031 | 0.308 | 0.054 |  |  |
| [.4 - .6] | PS=2 | 0.256 | 0.165 | 0.331 | 0.112 | 0.289 | 0.133 |  |  |
| [.6 - .8] | PS=1 | 0.249 | 0.170 | 0.523 | 0.548 | 0.338 | 0.260 |  |  |
| [.8 - 1.0] | PS=0 | 0.606 | 0.25 | 0.202 | 0.462 | 0.303 | 0.325 |  |  |
| Macro Average | | 0.430 | 0.289 | 0.337 | 0.236 | 0.338 | 0.165 | 0.170 | 0.032 |
