# Supplementary material for: An explainable language model predicts survival from medical reports in oncology
Source: Research Square preprint supplement (doi:10.21203/rs.3.rs-7121466/v1), 2025-08-27
Supplement: Supplementary file 3 [file d42413ee71824d24414b1198.docx]

**A validated and explainable deep learning model predicts survival from medical reports**

***Supplementary Figures legends***

**Supplementary Figure 1: Details on the composition of documents included in the two cohorts** (A-D. GR cohort and E-H. CLB cohort: CLB). **A,E**. Number of words per document. **B,F**. Number of sentences per document. **C,G**. Number of tokens per document. **D,H**. Number of documents per patient.

**Supplementary Figure 2: Details of the best-performing model performances on the GR cohort. A**. Visualization of the loss related to the number of epochs during training. **B-D**. Confusion matrices obtained with predictions from K-memBERT-T2 on the test set at 90 days (**B**), 365 days (**C**) and mean follow-up, i.e. 701 days (**D**). **E**. Mean average error of the model as compared to the time of event (x-axis). **F**. Standard deviation of the predictions compared to the error quantified as the difference between the mean predicted survival and true survival.

**Supplementary Figure 3: Details of the best-performing model performances on the CLB test cohort. A-C**. Confusion matrices obtained with predictions from K-memBERT-T2 on the test set at 90 days (**A**), 365 days (**B**) and mean follow-up, i.e. 701 days (**C**). **D**. Mean average error of the model as compared to the time of event (x-axis), **E** mean average error by the age of patients at diagnosis, **F** mean average error by the types of cancer of patients

**Supplementary Figure 4: Interpretation of the model’s predictions. A**. Line chart depicting the evolution of the model’s attention to medical terms given the layers of K-memBERT, showing increase attentions in the last two layers. **B,C**. Confusion matrices between true survival translated into a [0;1] distribution and the Performance Status for figure **B** or K-memBERT survival predictions intervals (without excluding texts containing the PS information) for figure **C**. **D.** Box plot showing the true survival according to the PS group, the intervals of predicted survival either using complet texts or after removing information about PS or KS in the texts.

**Supplementary Figure 5: Additional examples of results.**

The application outputs a continuous prediction of survival that correlates with prognosis, together with visualization modules that explain which words have been the most affecting the prediction, at which level and to which sense (influencing to bad prognosis or to good prognosis) to ensure a possible human review of the output. The figures shows an extract of the text, and the importance values (mean and standard deviation for multiple occurrences) of the words across all the texts token for a single prediction (i.e. 4 sequential most recent historical medical reports for each prediction with K-memBERT-T2). We advise a local installation with the code provided for a secured utilization of the application with protected health information.
